# Supplementary material for: Microcrystal electron diffraction (MicroED) structure determination of a mechanochemically synthesized co-crystal not affordable from solution crystallization
Source: Royal Society of Chemistry journal article supplement (doi:10.1039/d2ce01522f), 2022-12-24
Supplement: d2ce01522f1.pdf [file d2ce01522f1.pdf]

## Supplementary information

Microcrystal Electron Diffraction (MicroED) Structure Determination of a Mechanochemically Synthesized Co-crystal not Affordable from Solution Crystallization

Toshiyuki Sasaki,\*# Takanori Nakane,# Akihiro Kawamoto, Tomohiro Nishizawa, Genji Kurisu\*

# Contributed equally as co-first author

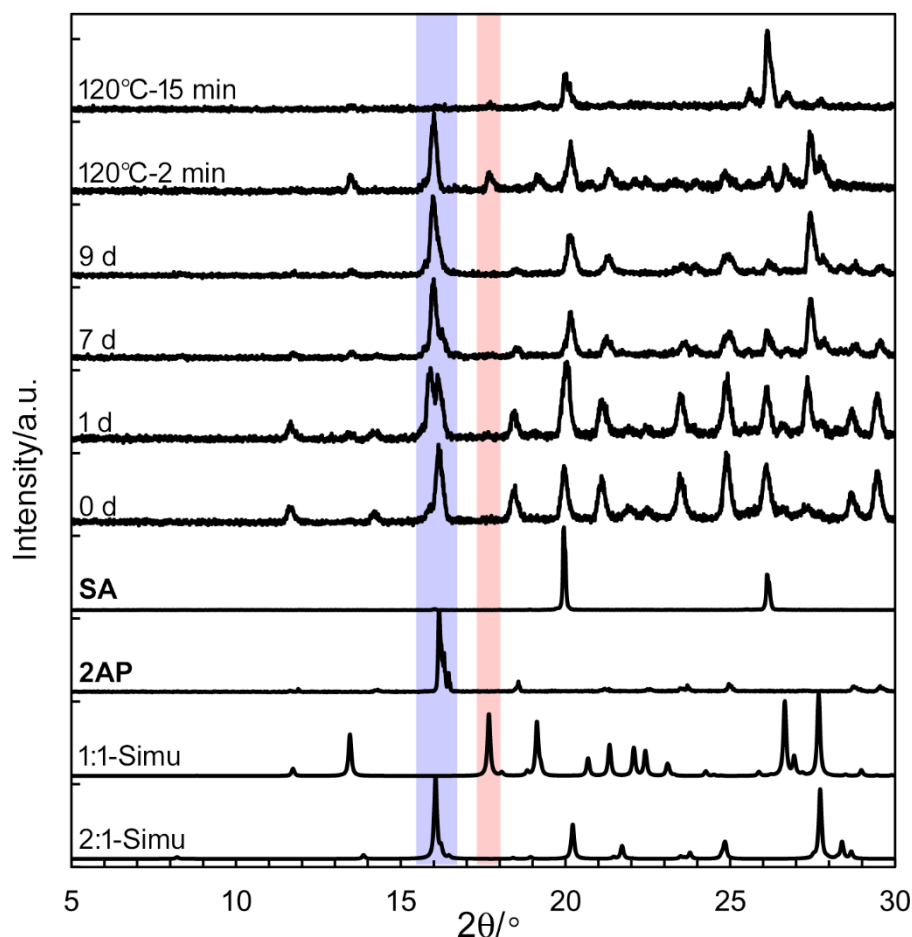

**Figure S1.** Powder XRD patterns: simulated from the crystal structures of the 2:1 co-crystal (2:1-Simu) and 1:1 co-crystal (1:1-Simu), and experimental patterns of as-purchased **2AP** (**2AP**), as-purchased **SA** (**SA**), the 2:1 co-crystal prepared by SSG after room temperature aging for 0 day (0 d), 1 day (1 d), 7 days (7 d), and 9 days (9 d). Powder XRD patterns of the 2:1 co-crystal heated by a hot stage (120°C) are shown for 120°C-2min and 120°C-15 min. Representative diffraction peaks of the 2:1 and 1:1 co-crystals are highlighted by blue and red, respectively.

The powder XRD measurements at 0 d in Figure S1 indicate that the ground sample was initially a mixture of **2AP** and **SA**. The mixture partially became a 2:1 co-crystal upon aging at room temperature for 1 d, as indicated by a bifurcated peak at  $2\theta=16^\circ$ . After 9 d, the 2:1 co-crystal became the primary component of the ground sample.

**Table S1.** Merging statistics of the 2:1 co-crystal solved by MicroED

| d_max | d_min | #obs  | #uniq | mult. | %com | <I> | <I/sI> | r_mrg | r_means | r_pim | cc1/2  |
|-------|-------|-------|-------|-------|------|-----|--------|-------|---------|-------|--------|
| 5.2   | 1.87  | 1561  | 137   | 11.39 | 100  | 4.2 | 34.2   | 0.117 | 0.123   | 0.036 | 0.994* |
| 1.87  | 1.50  | 1993  | 130   | 15.33 | 100  | 2.4 | 20.5   | 0.175 | 0.182   | 0.046 | 0.992* |
| 1.50  | 1.31  | 1800  | 121   | 14.88 | 100  | 1.2 | 10.4   | 0.261 | 0.271   | 0.069 | 0.955* |
| 1.31  | 1.19  | 2173  | 124   | 17.52 | 100  | 1.3 | 10.4   | 0.229 | 0.236   | 0.056 | 0.989* |
| 1.19  | 1.11  | 1936  | 120   | 16.13 | 100  | 1.2 | 8.1    | 0.250 | 0.258   | 0.063 | 0.990* |
| 1.11  | 1.04  | 1777  | 116   | 15.32 | 100  | 1.2 | 7.3    | 0.265 | 0.274   | 0.068 | 0.990* |
| 1.04  | 0.99  | 2085  | 115   | 18.13 | 100  | 0.8 | 5.8    | 0.336 | 0.347   | 0.081 | 0.968* |
| 0.99  | 0.95  | 2259  | 134   | 16.86 | 100  | 0.6 | 3.9    | 0.350 | 0.361   | 0.085 | 0.989* |
| 0.95  | 0.91  | 1909  | 107   | 17.84 | 100  | 0.4 | 2.7    | 0.508 | 0.525   | 0.125 | 0.768* |
| 0.91  | 0.88  | 1730  | 112   | 15.45 | 100  | 0.4 | 2.2    | 0.552 | 0.572   | 0.143 | 0.925* |
| 0.88  | 0.85  | 2156  | 121   | 17.82 | 100  | 0.3 | 2.0    | 0.595 | 0.612   | 0.141 | 0.911* |
| 0.85  | 0.83  | 2136  | 119   | 17.95 | 100  | 0.2 | 1.7    | 0.680 | 0.700   | 0.160 | 0.885* |
| 0.83  | 0.81  | 2285  | 129   | 17.71 | 100  | 0.2 | 1.2    | 0.792 | 0.816   | 0.189 | 0.890* |
| 0.81  | 0.79  | 1835  | 106   | 17.31 | 100  | 0.2 | 1.2    | 0.871 | 0.900   | 0.216 | 0.607* |
| 0.79  | 0.77  | 2193  | 125   | 17.54 | 100  | 0.2 | 0.9    | 1.071 | 1.103   | 0.258 | 0.568* |
| 0.77  | 0.75  | 1644  | 100   | 16.44 | 100  | 0.1 | 0.5    | 1.564 | 1.615   | 0.388 | 0.532* |
| 0.75  | 0.74  | 1992  | 120   | 16.60 | 100  | 0.1 | 0.7    | 1.283 | 1.324   | 0.318 | 0.740* |
| 0.74  | 0.73  | 2272  | 119   | 19.09 | 100  | 0.1 | 0.5    | 1.684 | 1.731   | 0.387 | 0.607* |
| 0.73  | 0.71  | 2184  | 120   | 18.20 | 100  | 0.1 | 0.6    | 1.492 | 1.536   | 0.352 | 0.575* |
| 0.71  | 0.70  | 2101  | 119   | 17.66 | 100  | 0.1 | 0.5    | 1.844 | 1.898   | 0.436 | 0.583* |
| 5.20  | 0.70  | 40021 | 2394  | 16.72 | 100  | 0.8 | 6.1    | 0.336 | 0.347   | 0.084 | 0.991* |

**Table S2.** Crystallographic parameters of the 2:1 co-crystal solved by MicroED ( $\lambda = 0.02508 \text{ \AA}$ ).

|                                                                                                                                      |                         |
|--------------------------------------------------------------------------------------------------------------------------------------|-------------------------|
| <b>Co-crystal</b>                                                                                                                    | <b>2:1</b>              |
| <b>Formula</b>                                                                                                                       | C6 H8 N3 O2             |
| <b><i>M</i></b>                                                                                                                      | 154.15                  |
| <b>Crystal system</b>                                                                                                                | Monoclinic              |
| <b>Space group</b>                                                                                                                   | <i>P2<sub>1</sub>/c</i> |
| <b>T /K</b>                                                                                                                          | 77                      |
| <b><i>a</i> /<math>\text{\AA}</math></b>                                                                                             | 10.759                  |
| <b><i>b</i> /<math>\text{\AA}</math></b>                                                                                             | 5.200                   |
| <b><i>c</i> /<math>\text{\AA}</math></b>                                                                                             | 12.760                  |
| <b><math>\alpha</math> /deg</b>                                                                                                      | 90                      |
| <b><math>\beta</math> /deg</b>                                                                                                       | 90.67                   |
| <b><math>\gamma</math> /deg</b>                                                                                                      | 90                      |
| <b><i>V</i> /<math>\text{\AA}^3</math></b>                                                                                           | 713.8                   |
| <b><i>Z</i></b>                                                                                                                      | 4                       |
| <b><i>D</i> / g cm<sup>-3</sup></b>                                                                                                  | 1.434                   |
| <b>No. of measured, independent, and observed reflections [<i>F<sub>o</sub></i> &gt; 4<math>\sigma</math>(<i>F<sub>o</sub></i>)]</b> | 21698, 1253, 864        |
| <b><i>R</i><sub>int</sub></b>                                                                                                        | 0.2442                  |
| <b>Resolution for refinement /<math>\text{\AA}</math></b>                                                                            | 0.84                    |
| <b>Completeness /%</b>                                                                                                               | 100                     |
| <b>Goodness of fit</b>                                                                                                               | 1.161                   |
| <b><i>RI</i> (for all reflections)</b>                                                                                               | 0.1079                  |
| <b><i>wR2</i></b>                                                                                                                    | 0.3038                  |
| <b><i>S</i></b>                                                                                                                      | 1.107                   |
| <b>No. of parameters</b>                                                                                                             | 133                     |
| <b>No. of restraints</b>                                                                                                             | 129                     |
| <b>Largest diff. peak (hole) /e<math>\text{\AA}^3</math></b>                                                                         | 0.135 (-0.183)          |
| <b>CCDC</b>                                                                                                                          | 2211429                 |

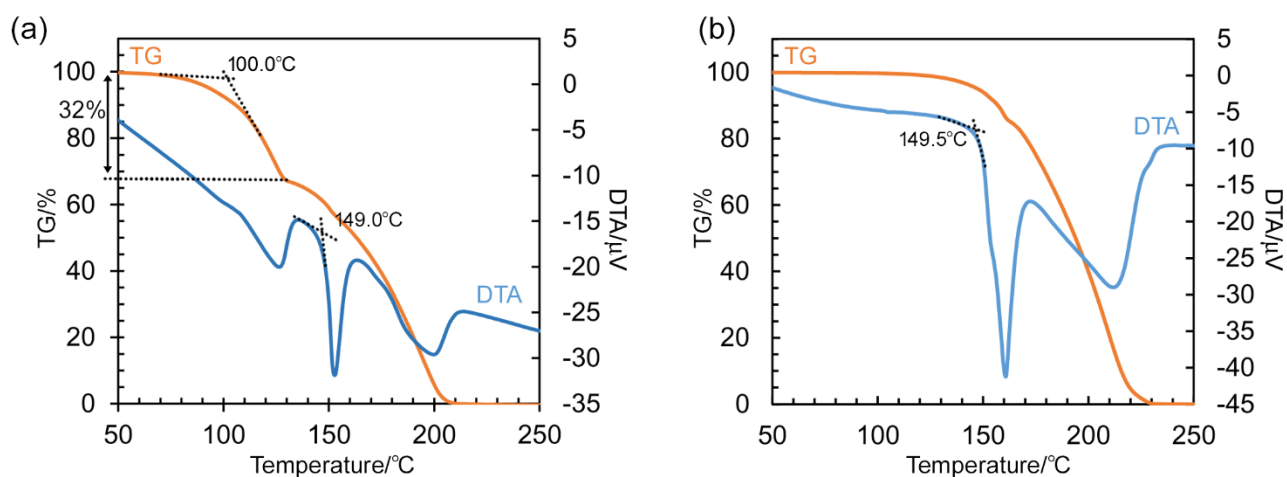

**Figure S2.** TG/DTA diagrams of (a) the 2:1 and (b) 1:1 co-crystals. The measurements were conducted on a STA7300 instrument (Hitachi High-Technologies Co.) with a ramping rate of  $10^{\circ}\text{C min}^{-1}$  under  $\text{N}_2$  flow ( $200\text{ mL min}^{-1}$ ).

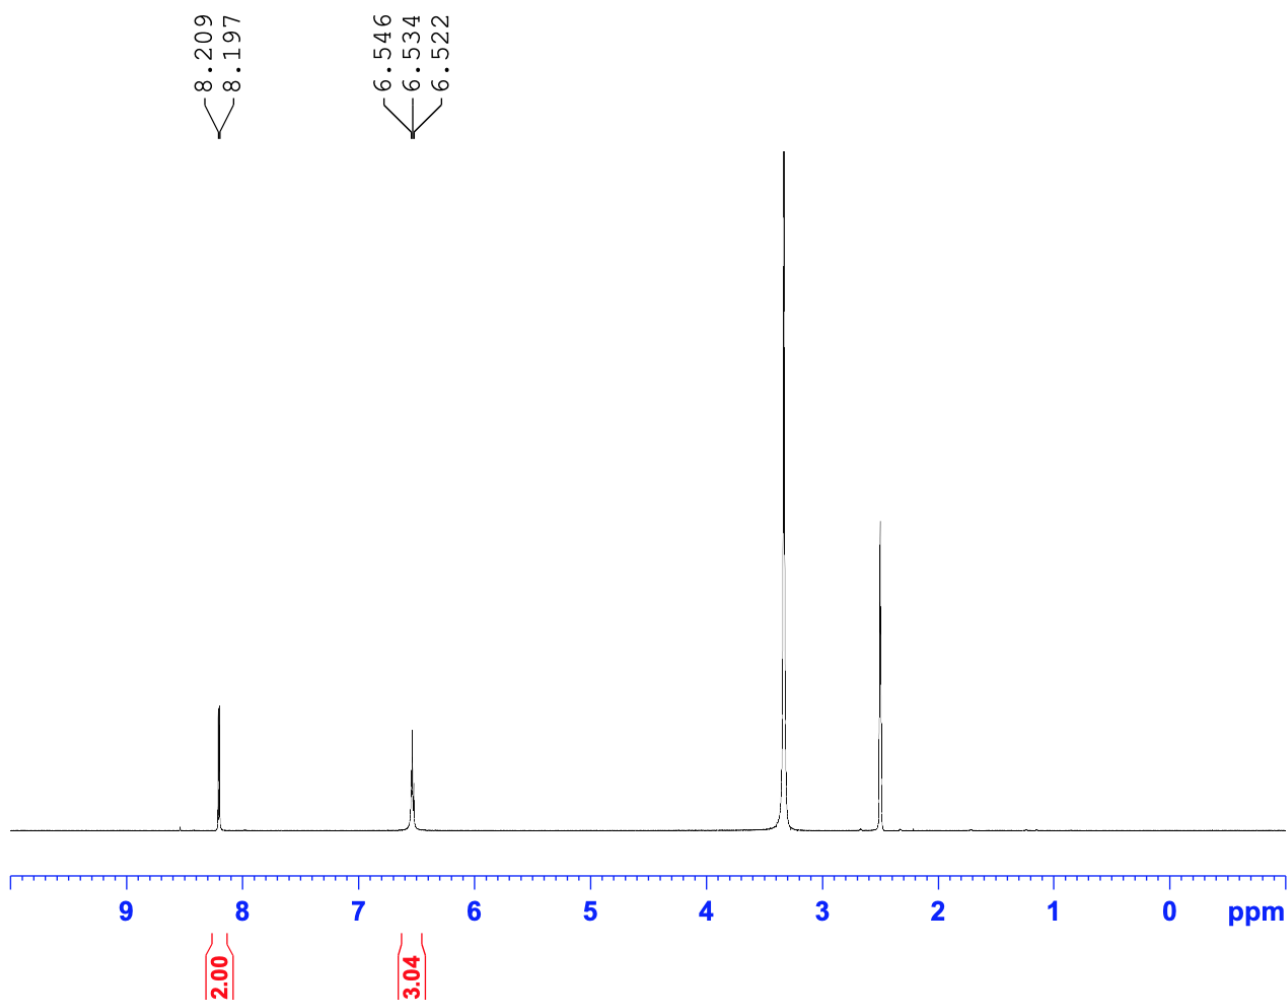

**Figure S3.**  $^1\text{H}$  NMR spectrum of the sublimated solid (400 MHz,  $\text{DMSO-}d_6$ ).

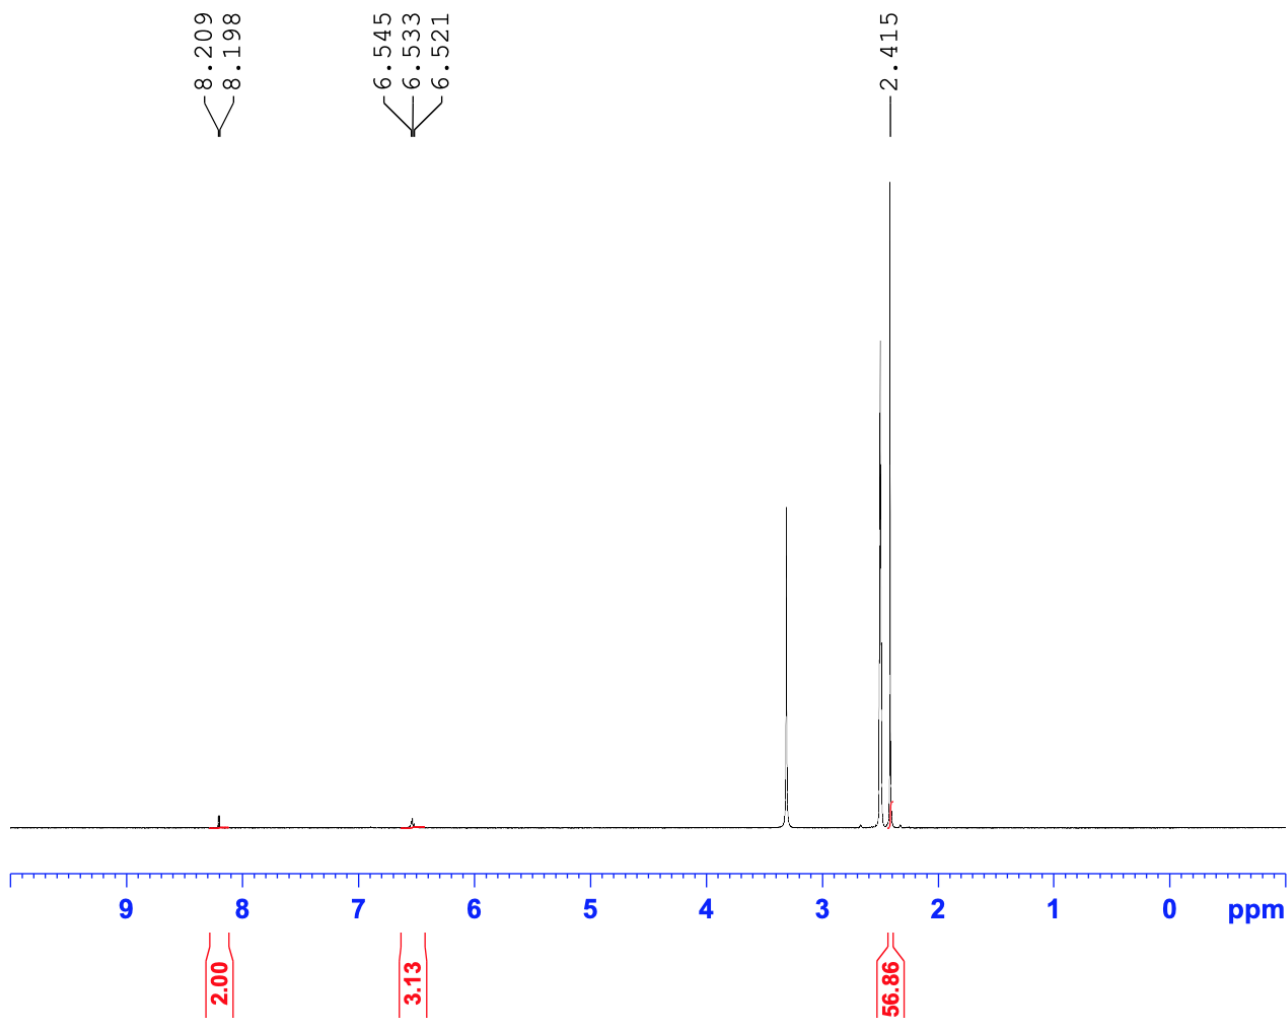

**Figure S4.** <sup>1</sup>H NMR spectrum of the 2:1 co-crystal after heating at 120 °C for 15 minutes (400 MHz, DMSO-*d*<sub>6</sub>).

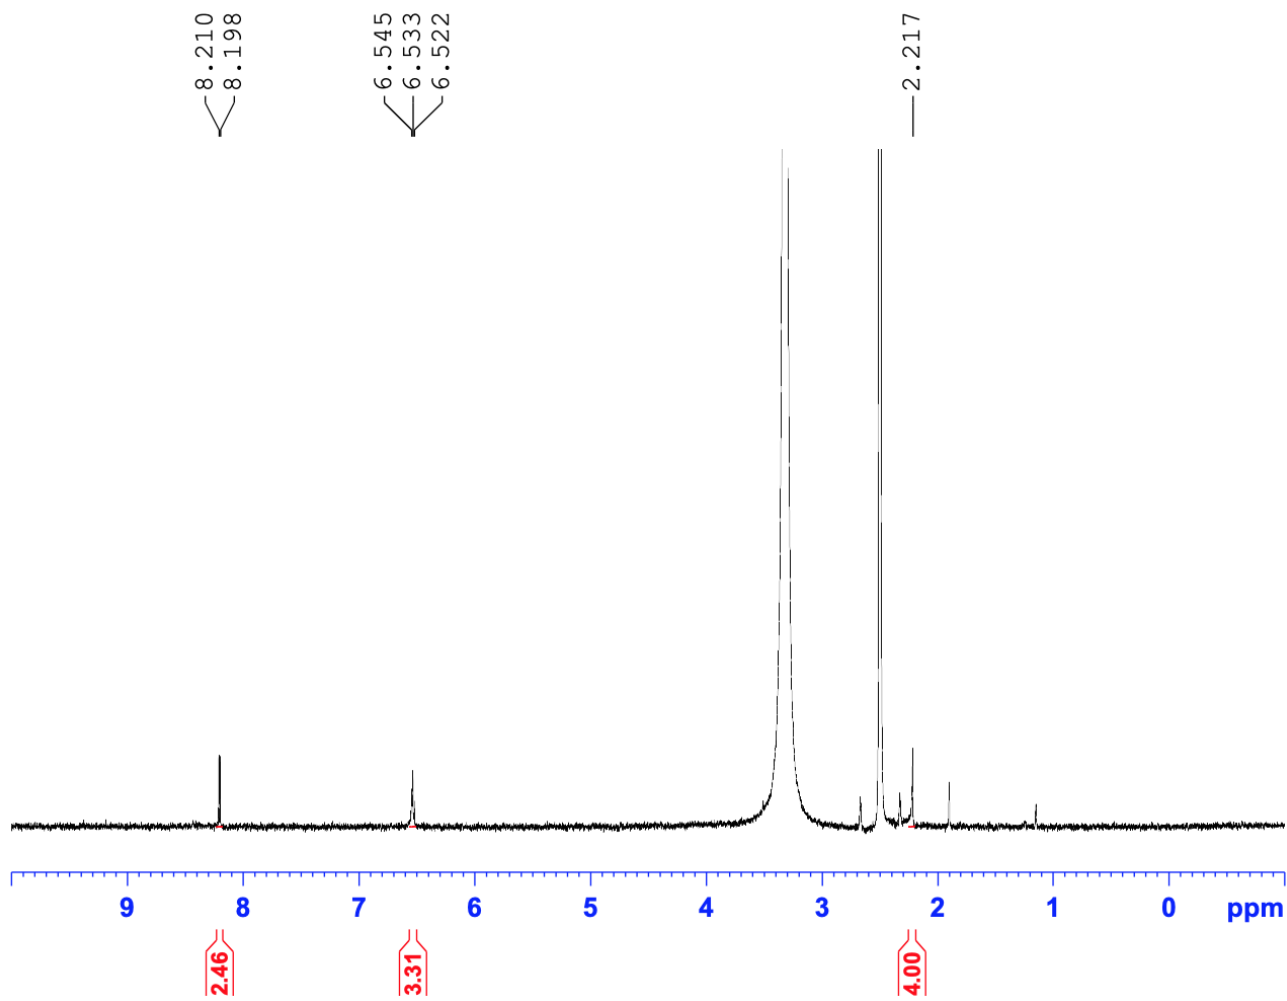

**Figure S5.** <sup>1</sup>H NMR spectrum of the 2:1 co-crystal after room temperature aging for 3 months (400 MHz, DMSO-*d*<sub>6</sub>).

**Table S3.** Crystallographic parameters of the 2:1 and 1:1 co-crystals optimized as a triclinic *P1* space group by CONFLEX (MMFF94s).<sup>S1-S12</sup>

| Co-crystal                    | 2:1            | 1:1             |
|-------------------------------|----------------|-----------------|
| Formula                       | C24 H32 N12 O8 | C32 H44 N12 O16 |
| Crystal system                | Triclinic      | Triclinic       |
| Space group                   | <i>P1</i>      | <i>P1</i>       |
| <i>a</i> /Å                   | 10.19030       | 5.16547         |
| <i>b</i> /Å                   | 5.33927        | 13.12736        |
| <i>c</i> /Å                   | 14.20800       | 15.48699        |
| $\alpha$ /deg                 | 90.00025       | 89.99911        |
| $\beta$ /deg                  | 87.46076       | 89.14460        |
| $\gamma$ /deg                 | 89.99973       | 89.99940        |
| <i>Z</i>                      | 1              | 1               |
| <i>V</i> /Å <sup>3</sup>      | 772.28064      | 1050.03961      |
| <i>D</i> / g cm <sup>-3</sup> | 1.32504        | 1.34783         |

## References

- [S1]. Goto, H.; Obata, S.; Nakayama N.; Ohta, K. *CONFLEX 8*, CONFLEX Corporation, Tokyo, Japan, 2017.
- [S2]. Goto, H.; Osawa, E. Corner Flapping: A Simple and Fast Algorithm for Exhaustive Generation of Ring Conformations. *J. Am. Chem. Soc.* **1989**, *111*, 8950–8951.
- [S3]. Obata, S.; Goto, H. Conformational Polymorphism Analysis of Aspirin Crystal with a Crystal Calculation Method. *J. Comput. Chem. Jpn.* **2008**, *7*, 151–164.
- [S4]. Obata, S.; Goto, H. Parallelization of Crystal Calculation for Large-Scale Molecular Crystal Structure Analysis. *J. Comput. Aided Chem.* **2008**, *9*, 8–16.
- [S5]. Obata, S.; Goto, H. High-Speed Prediction of Crystal Structures for Organic Molecules. *AIP Conf. Proc.* **2015**, *1649*, 130–134.
- [S6]. Halgren, T. A. Merck Molecular Force Field. I. Basis, Form, Scope, Parameterization, and Performance of MMFF94. *J. Comput. Chem.* **1996**, *17*, 490–519.
- [S7]. Halgren, T. A. Merck Molecular Force Field. II. MMFF94 van der Waals and Electrostatic Parameters for Intermolecular Interactions. *J. Comput. Chem.* **1996**, *17*, 520–552.
- [S8]. Halgren, T. A. Merck Molecular Force Field. III. Molecular Geometries and Vibrational Frequencies for MMFF94. *J. Comput. Chem.* **1996**, *17*, 553–586.
- [S9]. Halgren, T. A.; Nachbar, R. B. Merck Molecular Force Field. IV. Conformational Energies and Geometries for MMFF94. *J. Comput. Chem.* **1996**, *17*, 587–615.
- [S10]. Halgren, T. A. Merck Molecular Force Field. IV. Conformational Energies and Geometries for MMFF94. *J. Comput. Chem.* **1996**, *17*, 616–641.
- [S11]. Halgren, T. A. MMFF VI. MMFF94s Option for Energy Minimization Studies. *J. Comput. Chem.* **1999**, *20*, 720–729.
- [S12]. Halgren, T. A. MMFF VII. Characterization of MMFF94, MMFF94s, and Other Widely Available Force Fields for Conformational Energies and for Intermolecular-Interaction Energies and Geometries. *J. Comput. Chem.* **1999**, *20*, 730–748.
